# Supplementary material
Source: PubMed Central journal article supplement (PMC7580536)
Supplement: AEM.01402-20-s0001.pdf [file AEM.01402-20-s0001.pdf]

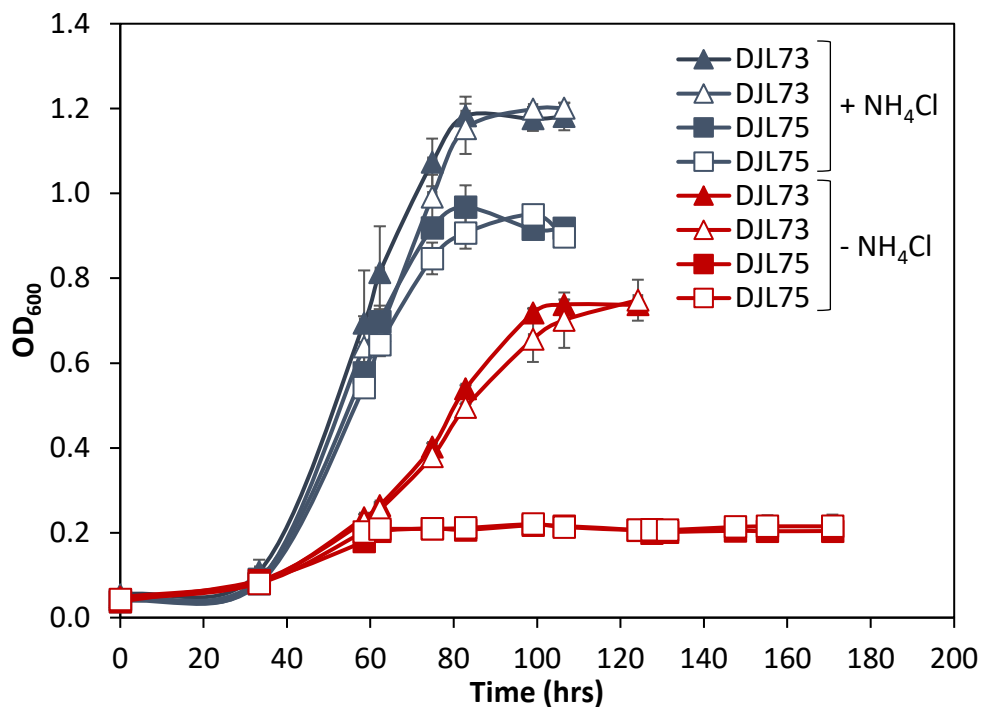

**Fig. S1. Comparison of the growth of *M. acetivorans* strain DJL73 to strain DJL75 with methanol +/- NH<sub>4</sub>Cl.** Strains DJL73 and DJL75 contain replicating versions of pDL730 and pDL732, respectively. Strains were grown in HS medium with 125 mM methanol and 18 mM NH<sub>4</sub>Cl as indicated. 50 mM tetracycline was added to cultures with open symbols. Data are the mean of four replicates and error bars represent standard deviation.
